# Supplementary material for: Structure of replicating SARS-CoV-2 polymerase
Source: Springer Nature journal article supplement (doi:10.1038/s41586-020-2368-8), 2020-05-21
Supplement: MOESM1 [file 41586_2020_2368_MOESM1_ESM.pdf › 41586_2020_2368_MOESM1_ESM.pdf]

---

**Supplementary information**

---

**Structure of replicating SARS-CoV-2  
polymerase**

---

In the format provided by the  
authors and unedited

Hauke S. Hillen, Goran Kokic, Lucas Farnung, Christian Dienemann, Dimitry Tegunov &  
Patrick Cramer✉

Supplementary Figure 1

Figure 1a  
Dashed box indicates cropping used in Figure 1a + horizontal reflection

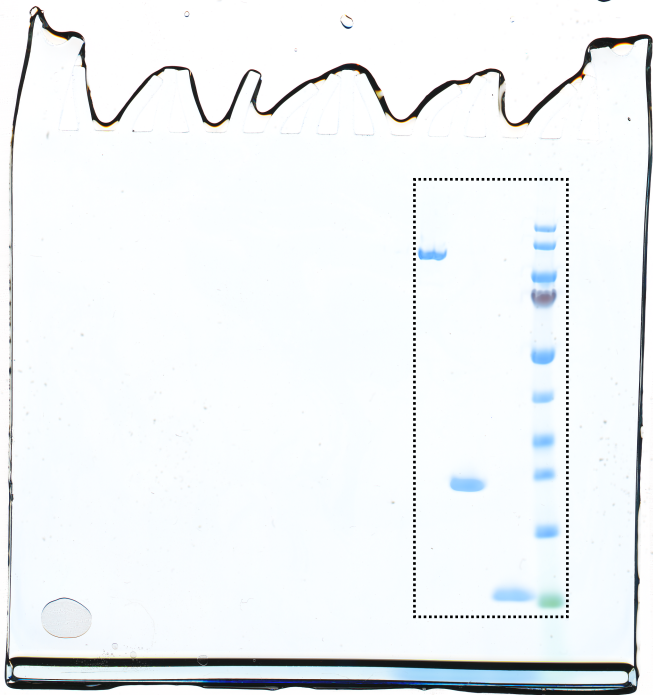

Molecular weight marker (top to bottom)  
140 kDa  
110 kDa  
80 kDa  
70 kDa (red/orange)  
50 kDa  
40 kDa  
30 kDa  
25 kDa  
15 kDa  
10 kDa (green)

Figure 1c  
Replicate 1

Replicate 2

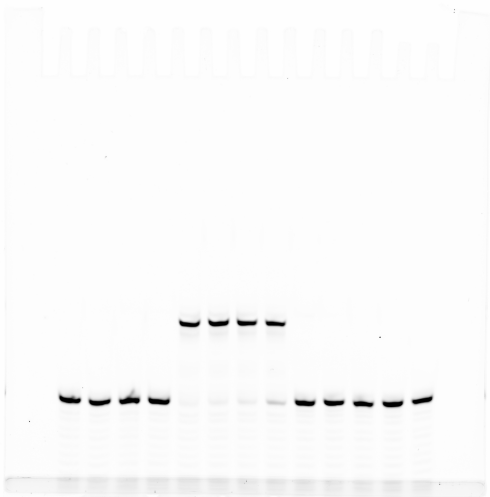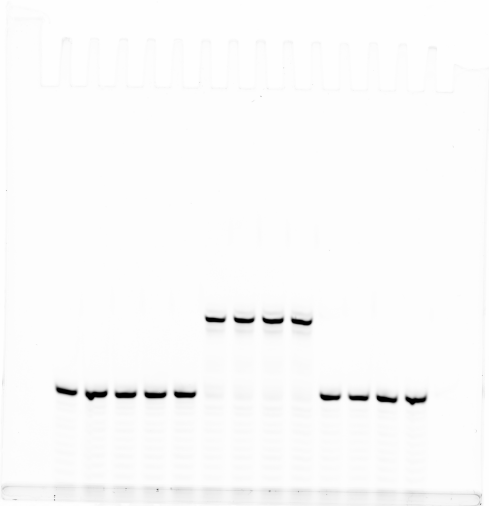

Replicate 3  
Dashed box indicates cropping used in Figure 1c

Extended Data Figure 1

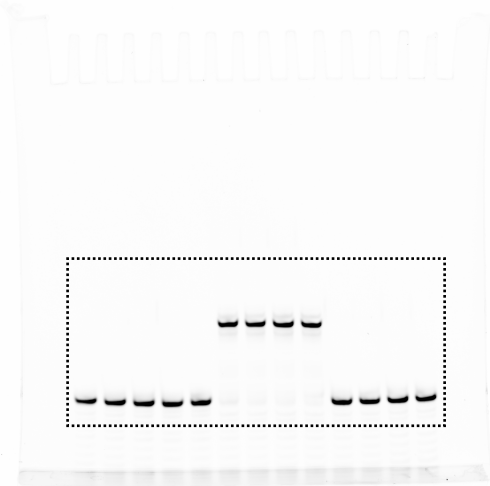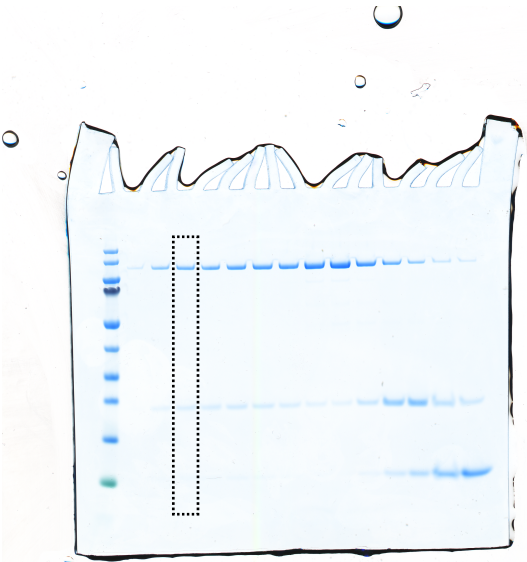

Molecular weight marker (top to bottom)  
140 kDa  
110 kDa  
80 kDa  
70 kDa (red/orange)  
50 kDa  
40 kDa  
30 kDa  
25 kDa  
15 kDa  
10 kDa (green)
